# Supplementary material
Source: PubMed Central journal article supplement (PMC3921072)

Supplemental Material

**Supplemental Table 1:** Imaging protocol. Images according to this protocol were taken during occlusion, 4h, and 24h post reperfusion. ONLINE ONLY

|                                                        | TR/TE      | Averages | Field of View        | Flip Angle           | Additional Information                                                                                                                    |
|--------------------------------------------------------|------------|----------|----------------------|----------------------|-------------------------------------------------------------------------------------------------------------------------------------------|
| T1                                                     | 500/10 ms  | 2        | 38.4 mm <sup>2</sup> | 90°-180° (spin echo) | Localizer                                                                                                                                 |
| T2                                                     | 2500/80 ms | 2        | 38.4 mm <sup>2</sup> | 90°-180° (spin echo) |                                                                                                                                           |
| DWI                                                    | 2500/80 ms | 2        | 38.4 mm <sup>2</sup> | 90°-180° (spin echo) | b factor=1030s/mm <sup>2</sup> applied along z-axis                                                                                       |
| T2* GRE                                                | 320/20 ms  | 4        | 38.4 mm <sup>2</sup> | 30°                  |                                                                                                                                           |
| snapshot FLASH inversion recovery                      | 3/3.5 ms   | 1        | 38.4 mm <sup>2</sup> | 10°                  | TI incremented from 100 to 2850 ms; Quantification of T1-values                                                                           |
| Permeability T1 DCE (dynamic contrast enhancement)     | 50/3.5 ms  | 1        | 38.4 mm <sup>2</sup> | 90°                  | 16 sets of images, 1 pre- and 15 post contrast sets; images repeated every 1.56 min; short bolus of 0.3mmol/kg Gd-DTPA (Magnevist; Bayer) |
| Perfusion T2* DSC (dynamic susceptibility enhancement) | 1000/17 ms | 1        | 50 mm <sup>2</sup>   | (echo planar)        | second short bolus of 0.3mmol/kg; 32 echo planar images acquired at 1s interval; 1 slice                                                  |

Supplemental Material

**Supplement Figure 1. Appearance of different types of hemorrhage on Cresyl-violet-stained sections.** Macroscopic hemorrhage, which was defined as bleeding visible to the naked eye, is shown magnified in A. A bleeding vessel is indicated by the white arrow. In B, microscopic hemorrhage is illustrated. Extravasated erythrocytes (black arrows) can be seen as well as plugged vessels (small white arrows). Scale bar = 100µm ONLINE ONLY

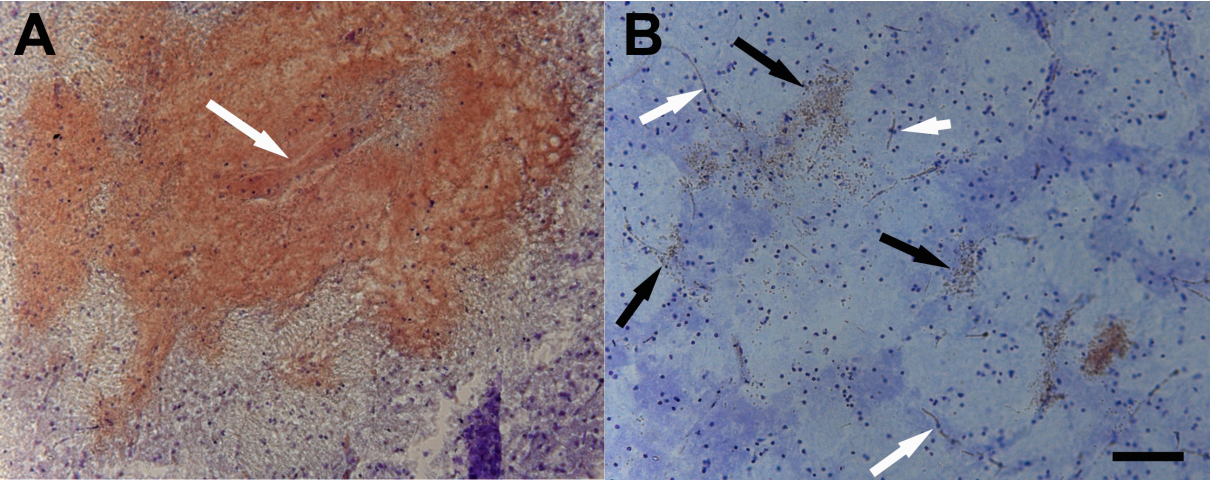

Supplemental Material

**Supplemental Figure 2. Distribution pattern of final infarction and hemorrhage patterns at 24h in Wistar (A, left) and SHR (B, right) rats.** The shading represents the fraction of animals that showed infarction (top row), macroscopic hemorrhage (center row), or microscopic hemorrhage (bottom row) in the corresponding location on Cresyl-violet sections (absent in all animals for white regions, present in all animals for black regions).

ONLINE ONLY

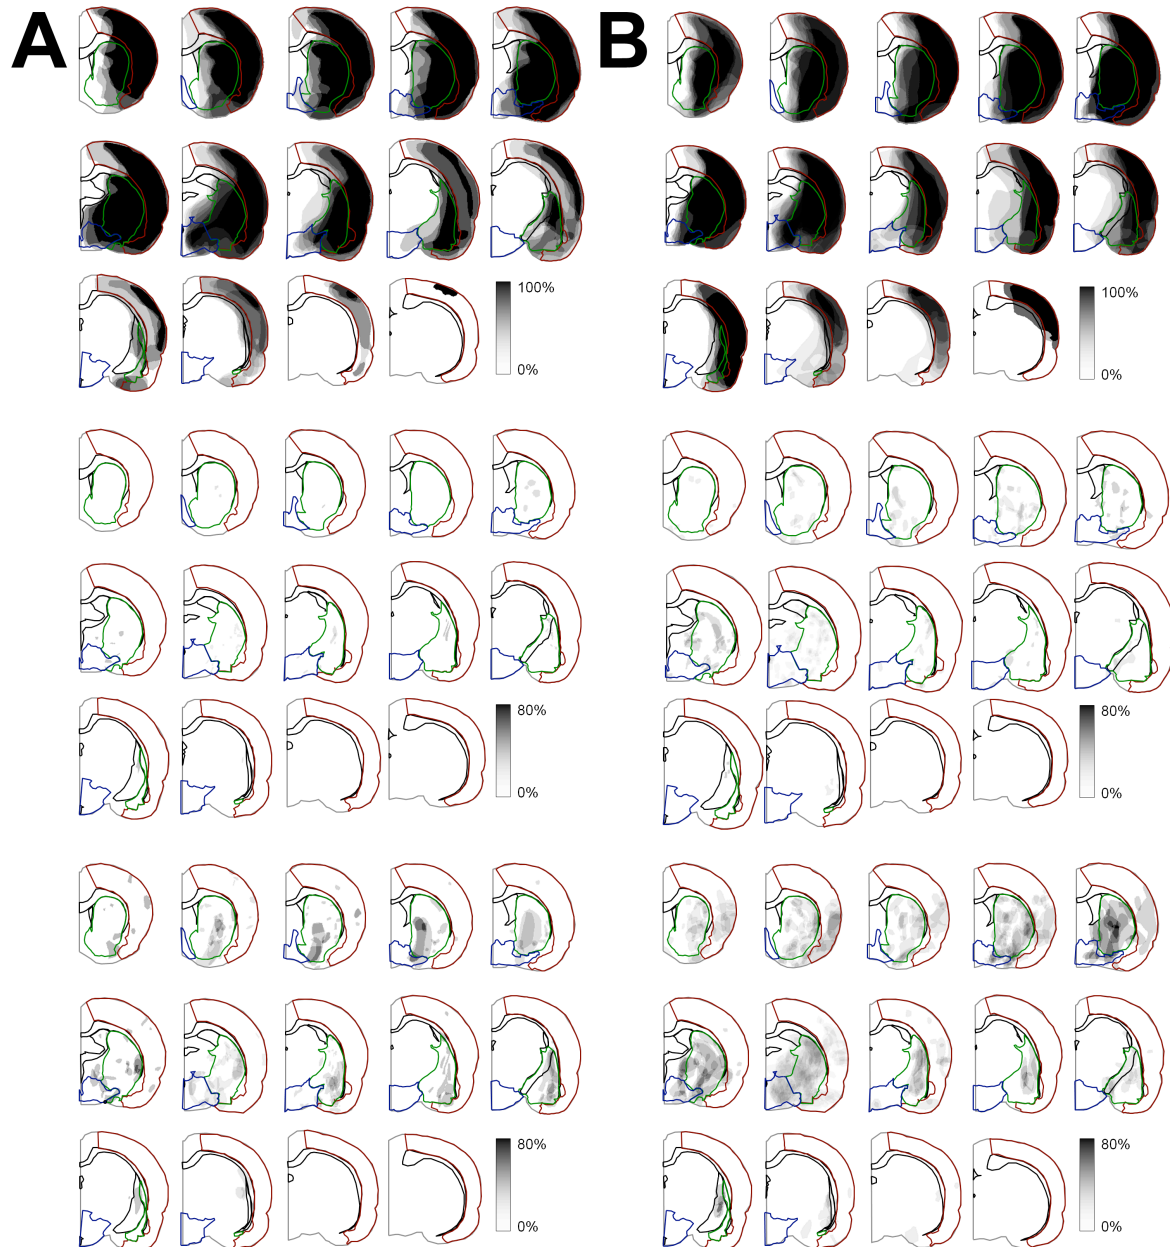

Supplemental Material

**Supplemental Figure 3. Occlusion and reperfusion of the right MCA territory.** DWI images show a persistent hyperintensity in the right MCA territory during occlusion and 4h after reperfusion. PWI images show low perfusion in the right MCA territory during occlusion and almost complete reperfusion at 4h after removal of the filament. ONLINE ONLY

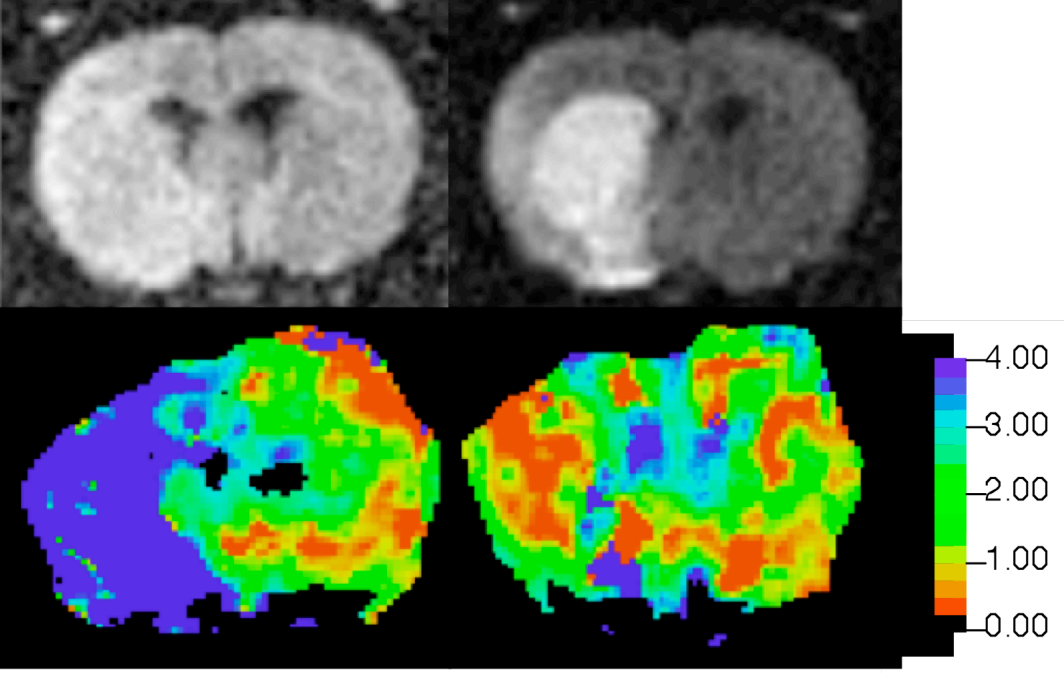

Supplement: NIHMS363592-supplement-1.pdf [file NIHMS363592-supplement-1.pdf]
